# Supplementary material
Source: HighWire-hosted journal article supplement (https://bmjopen.bmj.com/content/8/8/e020493)
Supplement: inline-supplementary-material-1 [file inline-supplementary-material-1.pdf]

## **APPENDIX A**

### **Questions of the interview guideline concerning workplace health promotion**

#### **Health promotion offers at the offshore workplace**

1. Are you aware of any health promotion programs that are offered at your workplace for offshore employees? If so:
  - 1.1 Which programs are these? (descriptions of the content)
  - 1.2 Who is offering them?
  - 1.3 Do you participate in the programs?
    - 1.3.1 If so: what were your experiences? (detailed descriptions)
    - 1.3.2 If not: why? (what are the reasons for non-participation?)

#### **Needs and wishes for health promotion programs**

If there are currently no health promotion programs being offered:

2. Would you like to have such programs at your place of work? If so:
  - 2.1. In which areas? (detailed descriptions)
