# Supplementary material
Source: HighWire-hosted journal article supplement (https://bmjopen.bmj.com/content/8/8/e020493)
Supplement: inline-supplementary-material-2 [file inline-supplementary-material-2.pdf]

## APPENDIX B

**Table B1**

| Categories of behavioural preventive measures showing the workers' wishes |           |
|---------------------------------------------------------------------------|-----------|
|                                                                           | <i>n</i>  |
| <b>Physical activity</b>                                                  | <b>15</b> |
| physical activity trainer/fitness trainer                                 | 7         |
| compulsory exercise courses for certain work groups                       | 3         |
| work-related back therapy/training                                        | 2         |
| ergonomics counselling/ergo therapy                                       | 2         |
| swimming pool                                                             | 1         |
| <b>Recovery</b>                                                           | <b>14</b> |
| relaxation techniques                                                     | 6         |
| sauna                                                                     | 5         |
| massages                                                                  | 2         |
| stress coping strategies                                                  | 1         |
| <b>Health counselling</b>                                                 | <b>10</b> |
| counselling/coaching                                                      | 5         |
| health education and training                                             | 4         |
| motivational training                                                     | 1         |
| <b>Social relations</b>                                                   | <b>8</b>  |
| group social activities                                                   | 5         |
| better communication onshore/offshore                                     | 2         |
| supervisor training                                                       | 1         |
| <b>Nutrition</b>                                                          | <b>6</b>  |
| nutritional counselling                                                   | 6         |
| <b>Health promotion</b>                                                   | <b>6</b>  |
| more workplace health promotion activities (not specified)                | 6         |
| <b>Smoking cessation</b>                                                  | <b>1</b>  |
| smoking cessation programs                                                | 1         |
| <b>Medical care</b>                                                       | <b>1</b>  |
| regular medical check-ups                                                 | 1         |

**Table B2**

| Categories of environmental preventive measures showing the workers' wishes |           |
|-----------------------------------------------------------------------------|-----------|
|                                                                             | <i>n</i>  |
| <b>Work organisation</b>                                                    | <b>33</b> |
| general improvements in work organisation (not specified)                   | 7         |
| reliable working hours                                                      | 6         |
| allowing exercise during working hours                                      | 5         |
| more staff                                                                  | 4         |
| other work-time models                                                      | 3         |
| more free time for non-work-related activities                              | 3         |
| better organisation of arrival/departure and transfers                      | 2         |
| create standards                                                            | 2         |
| better payment                                                              | 1         |
| <b>Nutrition</b>                                                            | <b>32</b> |
| better food (healthy, high-quality, regular offers, fresh fruits/drinks)    | 31        |
| catering on transfer boats                                                  | 1         |
| <b>Accommodation</b>                                                        | <b>32</b> |
| single cabins                                                               | 13        |
| better/new ships and living containers (replace older ones)                 | 7         |
| more privacy                                                                | 6         |
| better beds (bigger, better-quality, no bunk beds)                          | 5         |
| bigger cabins                                                               | 1         |
| <b>Physical activity</b>                                                    | <b>30</b> |
| provision of training rooms/better equipment in gyms                        | 27        |
| cost absorption for gyms <sup>a</sup>                                       | 2         |
| training rooms for specific working groups                                  | 1         |
| <b>Work environment</b>                                                     | <b>23</b> |
| noise reduction (e.g. due to air-conditioning)                              | 9         |
| better equipment in offices                                                 | 4         |
| more rooms for leisure activities                                           | 4         |
| better air-conditioning                                                     | 3         |
| more areas to withdraw from work                                            | 2         |
| heated workplaces                                                           | 1         |
| <b>Employer's mentality</b>                                                 | <b>7</b>  |
| honest interest in employees' health, focus on employees' needs             | 6         |
| gender equality                                                             | 1         |
| <b>Work tasks</b>                                                           | <b>5</b>  |
| necessary materials must be available and transferable                      | 2         |
| reduced manual handling of heavy materials                                  | 2         |
| reduced workload                                                            | 1         |

Note. <sup>a</sup> concerning workers accommodated on islands or the mainland
